# Supplementary material for: Approaching the structure of REBaB9O16 (RE = rare earth) by characterization of a new analogue Ba6Bi9B79O138
Source: Royal Society of Chemistry journal article supplement (doi:10.1039/c5tc00560d), 2015-01-01
Supplement: c5tc00560d1.pdf [file c5tc00560d1.pdf]

Electronic Supplementary Information for

Approaching the structure of  $REBaB_9O_{16}$  ( $RE$  = rare earth) by  
characterizations of its new analogue  $Ba_6Bi_9B_{79}O_{138}$

*Rihong Cong,<sup>a\*</sup> Zhengyang Zhou,<sup>a,b</sup> Qiaoqi Li,<sup>a</sup> Junliang Sun,<sup>b</sup> Jianhua Lin,<sup>b</sup> Tao  
Yang<sup>a\*</sup>*

<sup>a</sup> College of Chemistry and Chemical Engineering, Chongqing University, Chongqing  
400044, People's Republic of China

<sup>b</sup> Beijing National Laboratory for Molecular Sciences, State Key Laboratory of Rare  
Earth Materials Chemistry and Applications, College of Chemistry and Molecular  
Engineering, Peking University, Beijing 100871, People's Republic of China

\*Email: congrihong@cqu.edu.cn, taoyang@cqu.edu.cn; Tel: (86 23)65105065.

Table S1 Fractional atomic coordinates, occupancies and isotropic thermal displacement factors for **BBBO**.

| Atom | site | $x$         | $y$         | $z$         | Occupancy | $U_{\text{eq}}/\text{\AA}^2$ |
|------|------|-------------|-------------|-------------|-----------|------------------------------|
| Ba1  | 3a   | 0.0000      | 0.0000      | 0.06918(10) | 1         | 0.0118(3)                    |
| Ba2  | 3a   | 0.0000      | 0.0000      | 0.92743(10) | 1         | 0.0146(4)                    |
| Bi1  | 3a   | 0.0000      | 0.0000      | 0.1660      | 1         | 0.0070(2)                    |
| Bi2  | 3a   | 0.0000      | 0.0000      | 0.83060(2)  | 1         | 0.0070(2)                    |
| Bi3  | 3a   | 0.0000      | 0.0000      | 0.49833(4)  | 1         | 0.00539(14)                  |
| O1   | 3a   | 0.0000      | 0.0000      | -0.0044(8)  | 1         | 0.042(5)                     |
| O2   | 9b   | 0.0003(15)  | -0.3493(17) | 0.0893(4)   | 1         | 0.007(3)                     |
| O3   | 9b   | 0.3446(17)  | -0.0023(16) | 0.9062(4)   | 1         | 0.008(3)                     |
| O4   | 9b   | -0.3441(16) | 0.0062(15)  | 0.9064(4)   | 1         | 0.008(3)                     |
| O5   | 9b   | -0.3454(15) | -0.3531(16) | 0.0893(3)   | 1         | 0.006(2)                     |
| O6   | 9b   | -0.1329(19) | -0.266(2)   | 0.5308(3)   | 1         | 0.013(3)                     |
| O7   | 9b   | -0.1333(17) | 0.1303(17)  | 0.8662(2)   | 1         | 0.004(2)                     |
| O8   | 9b   | -0.524(2)   | -0.0473(17) | 0.9983(3)   | 1         | 0.041(3)                     |
| O9   | 9b   | -0.3882(15) | -0.1939(15) | 0.8631(2)   | 1         | 0.005(2)                     |
| O10  | 9b   | -0.031(2)   | -0.519(2)   | 0.0468(4)   | 1         | 0.041(3)                     |
| O11  | 9b   | -0.259(3)   | -0.003(3)   | 0.9731(4)   | 1         | 0.065(4)                     |
| O12  | 9b   | -0.490(2)   | 0.027(2)    | 0.9500(4)   | 1         | 0.041(3)                     |
| O13  | 9b   | 0.004(2)    | -0.255(3)   | 0.0238(4)   | 1         | 0.056(4)                     |
| O14  | 9b   | -0.5278(14) | -0.4726(14) | 0.1351(2)   | 1         | 0.0011(18)                   |
| O15  | 9b   | 0.131(2)    | -0.135(2)   | 0.1290(3)   | 1         | 0.012(3)                     |
| O16  | 9b   | -0.2007(16) | -0.4031(17) | 0.1309(2)   | 1         | 0.007(2)                     |

|    |    |           |            |             |     |           |
|----|----|-----------|------------|-------------|-----|-----------|
| B1 | 9b | -0.332(2) | 0.008 (2)  | 0.8753 (4)  | 1   | 0.004(4)  |
| B2 | 9b | 0.340(2)  | 0.004 (2)  | 0.8756 (5)  | 1   | 0.002(4)  |
| B3 | 9b | -0.003(3) | -0.336 (3) | 0.1214(7)   | 1   | 0.010(5)  |
| B4 | 9b | -0.333(2) | -0.343 (2) | 0.1208(4)   | 1   | 0.005(4)  |
| B5 | 9b | -0.497(3) | -0.001 (3) | 0.9200(5)   | 1   | 0.014(4)  |
| B6 | 9b | -0.005(3) | -0.500 (3) | 0.0755(4)   | 1   | 0.011(4)  |
| B7 | 9b | -0.418(4) | 0.005 (4)  | 0.9722(6)   | 1   | 0.052(6)  |
| B8 | 9b | 0.014(4)  | -0.407 (5) | 0.0240(7)   | 1   | 0.058(6)  |
| B9 | 9b | -0.166(8) | -0.006 (8) | -0.0019(12) | 7/9 | 0.086(13) |

Table S2 Selected bond distances for Ba<sub>6</sub>Bi<sub>9</sub>B<sub>79</sub>O<sub>138</sub>.

| Bond        | Distance ( Å ) | Bond   | Distance ( Å ) |
|-------------|----------------|--------|----------------|
| Bi1—O9 (×3) | 2.36(1)        | B4—O16 | 1.42(2)        |
| Bi1—O15(×3) | 2.49(1)        | B4—O5  | 1.47(3)        |
|             |                | B4—O14 | 1.50(2)        |
| Bi2—O7(×3)  | 2.44(1)        | B4—O15 | 1.52(2)        |
| Bi2—O16(×3) | 2.36(1)        |        |                |
|             |                | B5—O4  | 1.33(3)        |
| Bi3—O6(×3)  | 2.36(1)        | B5—O3  | 1.39(3)        |
| Bi3—O14(×3) | 2.35(1)        | B5—O12 | 1.41(3)        |
| Ba1—O2(×3)  | 2.90(1)        |        |                |
| Ba1—O5(×3)  | 2.90(1)        | B6—O2  | 1.33(2)        |
| Ba1—O13(×3) | 2.92(2)        | B6—O10 | 1.35(3)        |

---

|             |         |        |         |
|-------------|---------|--------|---------|
|             |         | B6—O5  | 1.36(2) |
| Ba2—O3(×3)  | 2.89(1) |        |         |
| Ba2—O4(×3)  | 2.89(1) | B7—O12 | 1.23(3) |
| Ba2—O11(×3) | 2.93(2) | B7—O11 | 1.28(4) |
|             |         | B7—O8  | 1.41(3) |
| B1—O7       | 1.42(2) |        |         |
| B1—O6       | 1.44(2) | B8—O13 | 1.23(4) |
| B1—O4       | 1.45(3) | B8—O10 | 1.31(3) |
| B1—O9       | 1.53(2) | B8—O8  | 1.39(3) |
|             |         |        |         |
| B2—O3       | 1.43(3) | B9—O1  | 1.28(5) |
| B2—O6       | 1.44(2) | B9—O11 | 1.38(6) |
| B2—O7       | 1.48(2) | B9—O13 | 1.41(6) |
| B2—O9       | 1.51(2) |        |         |
|             |         |        |         |
| B3—O16      | 1.43(2) |        |         |
| B3—O15      | 1.44(2) |        |         |
| B3—O2       | 1.50(4) |        |         |
| B3—O14      | 1.50(2) |        |         |

---

Table S3 Unit Cell parameters of  $\text{Ba}_6(\text{Bi}_{1-x}\text{Eu}_x)_9\text{B}_{79}\text{O}_{138}$ .

| $x$  | $a$ (Å) | $c$ (Å) | $V$ (Å <sup>3</sup> ) |
|------|---------|---------|-----------------------|
| 0    | 7.850   | 46.577  | 2485.6                |
| 0.02 | 7.850   | 46.575  | 2485.4                |
| 0.04 | 7.848   | 46.565  | 2484.0                |
| 0.10 | 7.847   | 46.557  | 2482.8                |
| 0.20 | 7.844   | 46.540  | 2479.6                |
| 0.30 | 7.839   | 46.529  | 2476.0                |
| 0.40 | 7.838   | 46.512  | 2474.5                |
| 0.50 | 7.828   | 46.526  | 2468.9                |
| 0.70 | 7.821   | 46.507  | 2463.5                |
| 0.80 | 7.810   | 46.571  | 2459.8                |
| 0.90 | 7.808   | 46.536  | 2459.8                |
| 1    | 7.804   | 46.523  | 2453.9                |

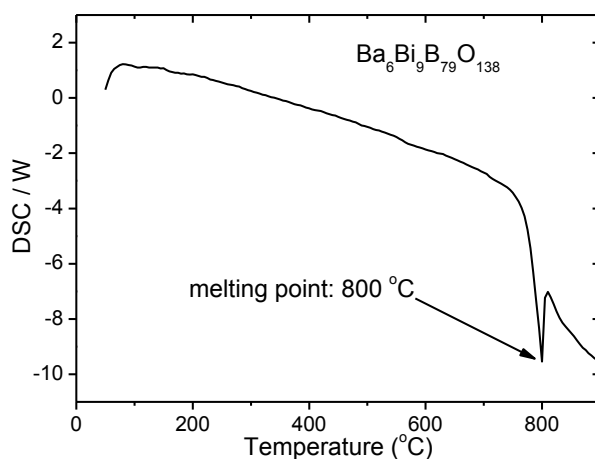

Fig. S1 DSC curve of the as-synthesized powder  $\text{Ba}_6\text{Bi}_9\text{B}_{79}\text{O}_{138}$ .

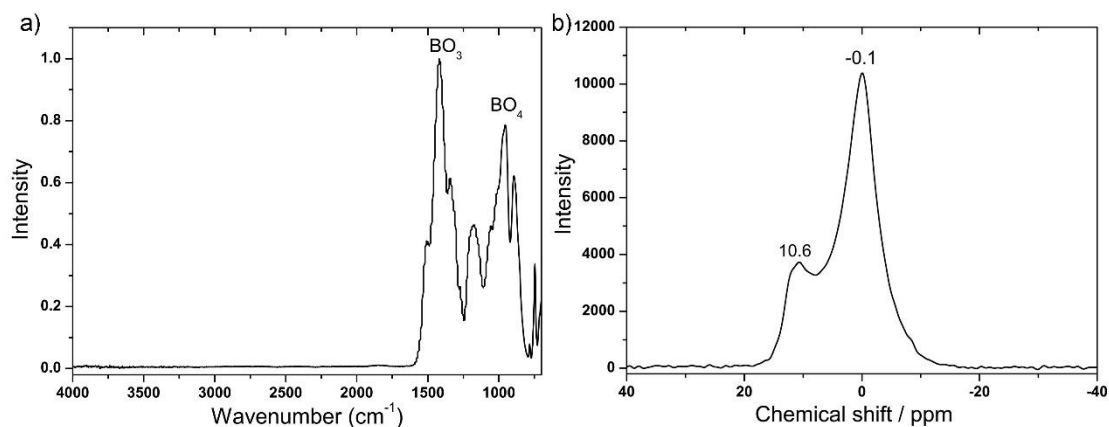

Fig. S2 The (a) IR and (b)  $^{11}\text{B}$  MAS-NMR spectra indicate the co-presence of triangular and tetrahedral coordination of B atoms in the structure.

The absorption bands in the range of  $1500\text{--}1100\text{ cm}^{-1}$  and  $1100\text{--}800\text{ cm}^{-1}$  in IR are generally assigned to the vibrations of the  $\text{BO}_3$  and  $\text{BO}_4$  groups, respectively. Generally, a single peak at around 0 ppm is related to the four-coordinated boron atoms, and the presence of three-coordinated boron atoms shows a broad band with two peaks at around 10 and 1 ppm in the solid-state  $^{11}\text{B}$  MAS-NMR spectrum. In detail, the strong peak at -0.1 ppm in Fig. S2b is typical for the four-coordinated boron atoms, and the peak at 10.6 ppm is related to the three-coordinated boron atoms, for which the other peak at around 1 ppm is overlapped with the signal of four-coordinated boron atoms.

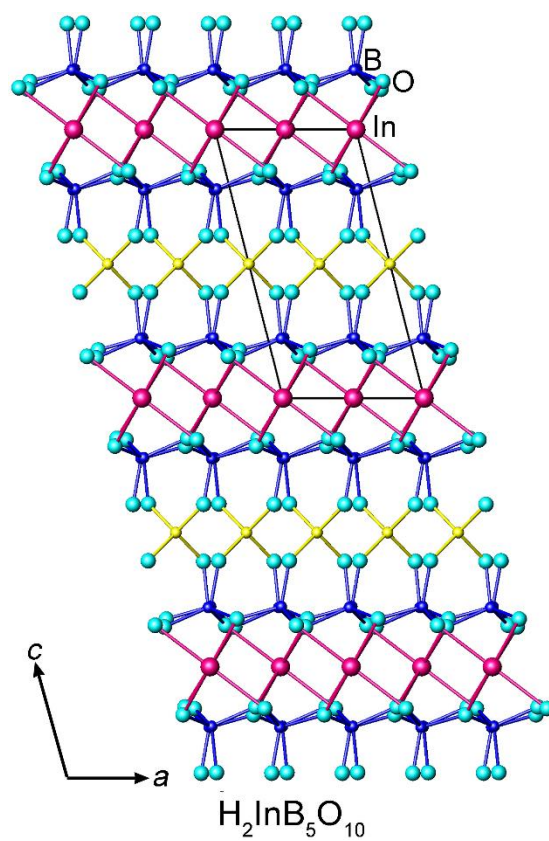

Fig. S3 Structure view of  $\text{H}_2\text{InB}_5\text{O}_{10}$  showing a similar metal-centered sandwiched layer.
